# Supplementary material
Source: HighWire-hosted journal article supplement (https://adc.bmj.com/content/104/2/152)
Supplement: inline-supplementary-material-1 [file inline-supplementary-material-1.pdf]

## SUPPLEMENTARY MATERIAL

**Supplementary Figure 1:** Per centre: development of refractory strictures ( $\geq 5$  dilations) of oesophageal end-to-end anastomosis

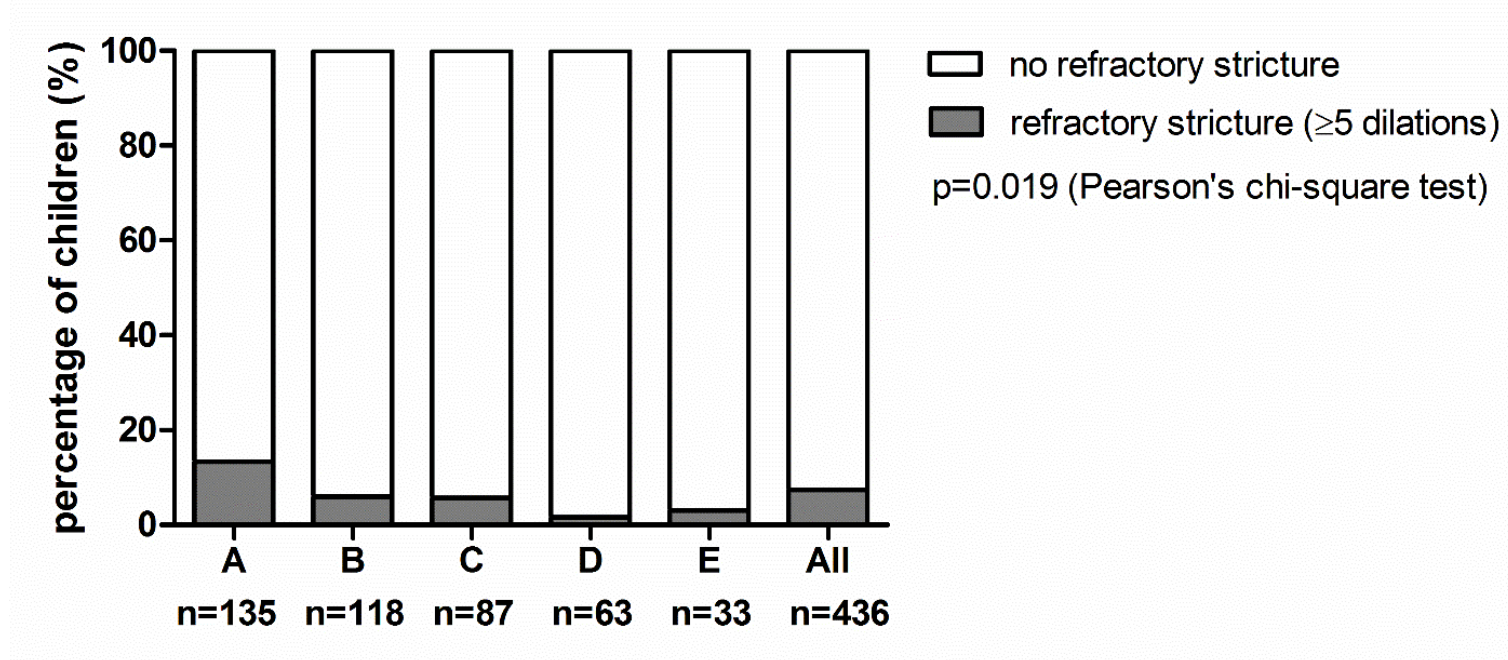

**Supplementary Table 1: Stent placement, mitomycin application and stricture resection**

| Treatment of stricture                                       | n  |
|--------------------------------------------------------------|----|
| Stent placement <sup>a</sup>                                 |    |
| Intraluminal solid silicone stent                            | 25 |
| Self-expanding silicone stent                                | 7  |
| Stent of unknown type                                        | 12 |
| Mitomycin application <sup>b</sup>                           | 6  |
| Stricture resection with end-to-end anastomosis <sup>c</sup> | 8  |

<sup>a</sup> Forty-four stents were placed in seven children (median of 3 (range 1-25) stents). The initial stent was placed after a median of 15 (range 6-26) dilations. In all seven children strictures reoccurred after the first stent placement.

<sup>b</sup> Mitomycin was applied in two children, in both cases additional dilations were still required.

<sup>c</sup> Resection surgery was performed in eight different children after median of 14 (range 0-30) dilations, in four children the stricture reoccurred.

**Supplementary Table 2: Strictures of oesophageal end-to-end anastomosis (N=436): characteristics of children with and without an anastomotic stricture requiring  $\geq 3$  dilations**

|                                                     | Stricture requiring $\geq 3$ dilations <sup>a</sup><br>(N=61) | No stricture requiring $\geq 3$ dilations<br>(N=375) |                  |
|-----------------------------------------------------|---------------------------------------------------------------|------------------------------------------------------|------------------|
|                                                     | n (%)<br>median (min; max; IQR)                               | n (%)<br>median (min; max; IQR)                      | p-value          |
| Male gender                                         | 35 (57.4)                                                     | 234 (62.4)                                           | 0.454            |
| Gestational age (weeks)                             | 37.3 (25.6; 42.0; 35.9-39.0)                                  | 38.3 (25.6; 42.9; 35.9-40.0)                         | <b>0.036</b>     |
| Prematurity                                         | 26 (42.6)                                                     | 123 (32.8)                                           | 0.158            |
| Birthweight (gram)                                  | 2600 (725; 4210; 2000-2965)                                   | 2800 (735; 4505; 2154-3251)                          | <b>0.016</b>     |
| Isolated OA (Gross type A)                          | 7 (11.5)                                                      | 7 (1.9)                                              | <b>0.002</b>     |
| Major associated anomaly                            | 18 (29.5)                                                     | 115 (30.7)                                           | 0.845            |
| Major cardiac anomaly                               | 3 (4.9)                                                       | 35 (9.3)                                             | 0.255            |
| Thoracoscopy                                        | 12 (19.7)                                                     | 40 (10.7)                                            | <b>0.044</b>     |
| Staged repair                                       | 14 (23.0)                                                     | 16 (4.3)                                             | <b>&lt;0.001</b> |
| Chest tube                                          | 18 (29.5)                                                     | 111 (29.6)                                           | 0.988            |
| Anastomotic leakage                                 | 14 (23.0)                                                     | 44 (11.7)                                            | <b>0.017</b>     |
| Recurrent tracheo-oesophageal fistula               | 4 (6.6)                                                       | 12 (3.2)                                             | 0.258            |
| History of gastro-oesophageal reflux                | 36 (59.0)                                                     | 163 (43.5)                                           | <b>0.007</b>     |
| Anti-reflux surgery                                 | 1 (1.6) <sup>a</sup>                                          | 49 (13.1)                                            | <b>0.009</b>     |
| Early stricture ( $\leq 28$ days after anastomosis) | 17 (27.9)                                                     | 16 (4.3)                                             | <b>&lt;0.001</b> |

OA: oesophageal atresia. Non-parametric Mann-Whitney U test for continuous variables and Pearson's chi-square test or Fisher's exact test (if expected counts were  $< 5$ ) for categorical variables.

<sup>a</sup> Anti-reflux surgery was performed in 29 of 61 (47.53%) children with a stricture requiring  $\geq 3$  dilations: one prior to and 28 after the third dilation of the stricture.

**Supplementary Table 3: Multivariable logistic regression analysis for anastomotic strictures requiring  $\geq 3$  dilations in children with oesophageal end-to-end anastomosis (N=436)**

|                                                     | OR    | 95% CI     | p-value          |
|-----------------------------------------------------|-------|------------|------------------|
| Gestational age (weeks)                             | 0.96  | 0.86-1.06  | 0.403            |
| Isolated OA (Gross type A)                          | 5.79  | 1.80-18.57 | <b>0.003</b>     |
| Thoracoscopy                                        | 0.72  | 0.30-1.72  | 0.460            |
| Anastomotic leakage                                 | 2.93  | 1.33-6.43  | <b>0.007</b>     |
| Early stricture ( $\leq 28$ days after anastomosis) | 10.59 | 4.50-24.90 | <b>&lt;0.001</b> |

CI: confidence interval; OA: oesophageal atresia; OR: odds ratio. Adjusted for centre. Hosmer & Lemeshow goodness of fit test  $p=0.274$ . Due to missing values for gestational age 6/436 children were excluded from the multivariable logistic regression analysis.

**Supplementary Table 4: Strictures of oesophago-jejunal anastomosis (N=13): characteristics of children with and without an anastomotic stricture requiring  $\geq 3$  dilations**

|                                                     | Stricture requiring $\geq 3$ dilations <sup>a</sup><br>(N=6) | No stricture requiring $\geq 3$ dilations<br>(N=7) |              |
|-----------------------------------------------------|--------------------------------------------------------------|----------------------------------------------------|--------------|
|                                                     | n (%)<br>median (min; max; IQR)                              | n (%)<br>median (min; max; IQR)                    | p-value      |
| Male gender                                         | 5 (83.3)                                                     | 1 (14.3)                                           | <b>0.029</b> |
| Gestational age (weeks)                             | 35.1 (31.4; 37.6; 32.6-37.1)                                 | 37.1 (27.9; 38.1; 33.4-38.0)                       | 0.431        |
| Prematurity                                         | 4 (66.7)                                                     | 3 (42.9)                                           | 0.592        |
| Birthweight (gram)                                  | 2203 (1875; 2729; 2020-2509)                                 | 2840 (932; 3230; 1642-2905)                        | 0.668        |
| Isolated OA (Gross type A)                          | 6 (100)                                                      | 6 (85.7)                                           | 1.000        |
| Major associated anomaly                            | 2 (33.3)                                                     | 3 (42.9)                                           | 1.000        |
| Major cardiac anomaly                               | 0                                                            | 1 (14.3)                                           | 1.000        |
| Thoracoscopy                                        | 0                                                            | 0                                                  | -            |
| Staged repair                                       | 6 (100)                                                      | 7 (100)                                            | -            |
| Chest tube                                          | 4 (66.7)                                                     | 5 (71.4)                                           | 1.000        |
| Anastomotic leakage                                 | 1 (16.7)                                                     | 0                                                  | 0.462        |
| Recurrent tracheo-oesophageal fistula               | 0                                                            | 0                                                  | -            |
| History of gastro-oesophageal reflux                | 2 (33.3)                                                     | 4 (57.1)                                           | 1.000        |
| Anti-reflux surgery                                 | 0                                                            | 0                                                  | -            |
| Early stricture ( $\leq 28$ days after anastomosis) | 1 (16.7)                                                     | 0                                                  | 0.462        |

OA: oesophageal atresia. Non-parametric Mann-Whitney U test for continuous variables and Pearson's chi-square test or Fisher's exact test (if expected counts were  $< 5$ ) for categorical variables.

<sup>a</sup>. Anti-reflux surgery was performed in three of six (50.0%) children with a stricture requiring  $\geq 3$  dilations, all three were performed after the third dilation of the stricture.

## APPENDIX: DCEA STUDY GROUP

*Members of the centres that participated:*

Erasmus MC University Medical Center - Sophia Children's Hospital (Rotterdam, The Netherlands): R.M.H. (René) Wijnen, H. (Hanneke) IJsselstijn, M.C.W. (Manon) Spaander, M.J. (Marco) Bruno, J. (John) Vlot, B.A.E. (Barbara) de Koning.

Paediatric Surgical Center of Amsterdam (Academic Medical Center and VU Medical Center): M.W.N. (Matthijs) Oomen, W.G. (Wendela) Leeuwenburgh, M.P. (Michiel) van Wijk, J.J.G.H.M. (Jacques) Bergman.

Radboud University Medical Center-Amalia Children's Hospital (Nijmegen, The Netherlands): M. (Maarten) Schurink, H. (Horst) Scharbatke, G.M. (Gerard) Damen, P.D. (Peter) Siersema, I. (Ivo) de Blaauw.

University Medical Center Groningen-Beatrix Children's Hospital (Groningen, The Netherlands): J.B.F. (Jan) Hulscher, T.H. (Anton) van Dijk, F.T.M. (Frans) Peters

Maastricht University Medical Center (Maastricht, The Netherlands): M. (Marc) Dirix, W. (Wim) van Gemert, R. (Rogier) de Ridder.
